# Supplementary material for: APEX (Aqueous Photochemistry of Environmentally occurring Xenobiotics): a free software tool to predict the kinetics of photochemical processes in surface waters
Source: Royal Society of Chemistry journal article supplement (doi:10.1039/c3em00541k), 2013-11-13
Supplement: c3em00541k.zip [file APEX_Errors.xls]

## Sheet: Error calculation
Fill in the data in the yellow cells (second order reaction rate constants, photolysis quantum yield, product yields and their absolute errors)
(replace the existing values with the relevant ones for your compound, you can place 0 for unknown or negligible values)
kP_OH	10000000000		y_OH	0.19
er_kP_OH	300000000		er_y_OH	0.04		reler_NO3_OH		0.05
						reler_NO2_OH		0.08
kP_CO3	20000000		y_CO3	0.076		reler_CDOM_OH		0.13
er_kP_CO3	1000000		er_y_CO3	0.003		reler_DOM_OH		0.15
						reler_CDOM_CO3		0.32
kP_DOM	3000000000		y_DOM	0.23		reler_CDOM_1O2		0.27
er_kP_DOM	500000000		er_y_DOM	0.07		reler_CDOM_3DOM		0.22
kP_1O2	100000000		y_1O2	0.15
er_kP_1O2	20000000		er_y_1O2	0.03
fi_P	1e-05		y_Phot	0.12
er_fi_P	2e-06		er_y_Phot	0.02
Copy and paste a line from an output file to replace the line of numbers below
	X	Y	t_OH	t_CO3	t_1O2	t_3DOM	t_Phot	t_tot	k_OH	k_CO3	k_1O2	k_3DOM	k_Phot	k_tot	coOH	coCO3	co1O2	co3DOM	f_OH	f_CO3	f_1O2	f_3DOM	f_Phot	f_tot	y_tot	role_OH_P	role_CO3_P	role_1O2_P	role_3DOM_P	role_Phot_P	role_OH_I	role_CO3_I	role_1O2_I	role_3DOM_I	role_Phot_I	NO3_OH	NO2_OH	DOM_OH
Paste here =>	0.01	1e-06	4.41587	3.17071e+08	5.08344e+10	99.286	14.5836	3.27763	0.156967	2.1861e-09	1.36354e-11	0.00698132	0.0475293	0.211478	4.29587e-16	5.99235e-14	3.79467e-16	1.94287e-16	0.0156967	2.1861e-12	1.36354e-15	6.98132e-08	4.75293e-08	0.0156969	0.0742245	0.74224	1.03372e-08	6.44766e-11	0.033012	0.224748	0.999993	1.3927e-10	8.6867e-14	4.44759e-06	3.02795e-06	0.115389	0.811408	0.073203
Please do not modify the cells below. Errors on parameters will be calculated based on input data
Calculation results	Parameters		t_OH	t_CO3	t_1O2	t_3DOM	t_Phot	t_tot	k_OH	k_CO3	k_1O2	k_3DOM	k_Phot	k_tot	coOH	coCO3	co1O2	co3DOM	f_OH	f_CO3	f_1O2	f_3DOM	f_Phot	f_tot	y_tot	role_OH_P	role_CO3_P	role_1O2_P	role_3DOM_P	role_Phot_P	role_OH_I	role_CO3_I	role_1O2_I	role_3DOM_I	role_Phot_I
			4.41587	3.17071e+08	5.08344e+10	99.286	14.5836	3.27763	0.156967	2.1861e-09	1.36354e-11	0.00698132	0.0475293	0.211478	4.29587e-16	5.99235e-14	3.79467e-16	1.94287e-16	0.0156967	2.1861e-12	1.36354e-15	6.98132e-08	4.75293e-08	0.0156969	0.0742245	0.74224	1.03372e-08	6.44766e-11	0.033012	0.224748	0.999993	1.3927e-10	8.6867e-14	4.44759e-06	3.02795e-06
	Absolute errors		er_t_OH	er_t_CO3	er_t_1O2	er_t_3DOM	er_t_Phot	er_t_tot	er_k_OH	er_k_CO3	er_k_1O2	er_k_3DOM	er_k_Phot	er_k_tot	er_coOH	er_coCO3	er_co1O2	er_co3DOM	er_f_OH	er_f_CO3	er_f_1O2	er_f_3DOM	er_f_Phot	er_f_tot	er_y_tot	er_role_OH_P	er_role_CO3_P	er_role_1O2_P	er_role_3DOM_P	er_role_Phot_P	er_role_OH_I	er_role_CO3_I	er_role_1O2_I	er_role_3DOM_I	er_role_Phot_I
			1.149	9.89891e+07	2.38922e+10	38.3906	2.91671	0.822174	0.0408427	6.82496e-10	6.40863e-12	0.00269944	0.00950587	0.053048	9.88903e-17	1.57119e-14	1.02456e-16	4.27432e-17	0.00738884	7.68789e-13	9.13571e-16	4.82419e-08	1.74274e-08	0.00738891	0.0535581	0.19313	3.22727e-09	3.0304e-11	0.0127647	0.0449497	0.470721	4.89773e-11	5.82009e-14	3.07335e-06	1.11025e-06
	Relative errors		0.260198	0.312198	0.47	0.386667	0.2	0.250844	0.260198	0.312198	0.47	0.386667	0.2	0.250844	0.230198	0.262198	0.27	0.22	0.470725	0.351672	0.67	0.691014	0.366667	0.470725	0.721569	0.260198	0.312198	0.47	0.386667	0.2	0.470725	0.351672	0.67	0.691014	0.366667
	Relative errors, percentage		26.0198	31.2198	47	38.6667	20	25.0844	26.0198	31.2198	47	38.6667	20	25.0844	23.0198	26.2198	27	22	47.0725	35.1672	67	69.1014	36.6667	47.0725	72.1569	26.0198	31.2198	47	38.6667	20	47.0725	35.1672	67	69.1014	36.6667
