# Supplementary material for: APEX (Aqueous Photochemistry of Environmentally occurring Xenobiotics): a free software tool to predict the kinetics of photochemical processes in surface waters
Source: Royal Society of Chemistry journal article supplement (doi:10.1039/c3em00541k), 2013-11-13
Supplement: c3em00541k.zip [file APEX_Season.xls]

## Sheet: UVB
USE THIS SHEET IF THE POLLUTANT MOSTLY ABSORBS SUNLIGHT IN THE UVB REGION
	UVB	UVA	300-450 nm
January	0.0673	0.197	0.214
February	0.168	0.352	0.37
March	0.389	0.596	0.604
April	0.72	0.862	0.86
May	0.924	0.979	0.966
June	1.05	1.03	1.01		PLEASE DO NOT MODIFY THESE ENTRIES
July	1	1	1
August	0.985	0.934	0.928
September	0.596	0.664	0.671
October	0.303	0.421	0.439
November	0.101	0.22	0.238
December	0.04	0.129	0.143
Copy and paste an entire line from an output .csv file to replace the line of numbers below (the output files are those generated by SAVETABLE)
	X	Y	t_OH	t_CO3	t_1O2	t_3DOM	t_Phot	t_tot	k_OH	k_CO3	k_1O2	k_3DOM	k_Phot	k_tot	coOH	coCO3	co1O2	co3DOM	f_OH	f_CO3	f_1O2	f_3DOM	f_Phot	f_tot	y_tot	role_OH_P	role_CO3_P	role_1O2_P	role_3DOM_P	role_Phot_P	role_OH_I	role_CO3_I	role_1O2_I	role_3DOM_I	role_Phot_I	NO3_OH	NO2_OH	DOM_OH		OH_calc
Paste here =>	1	1e-06	5.65575	20.6232	579.58	37.733	21.9666	3.34391	0.122556	0.03361	0.00119595	0.0183698	0.0315546	0.207287	3.35411e-16	4.60646e-14	3.32827e-16	1.70408e-16	0.0232857	0.00255436	0.000179392	0.00422505	0.00378656	0.034031	0.164174	0.59124	0.162143	0.00576954	0.0886201	0.152227	0.684248	0.0750598	0.00527143	0.124153	0.111268	0.0991236	0.818643	0.0822334
Calculation results	January		30.4824	111.152	2708.32	176.323	326.398	19.6395	0.0227393	0.00623606	0.000255933	0.00393113	0.00212363	0.035286	6.22327e-17	8.54689e-15	7.12251e-17	3.64672e-17	0.00432046	0.00047394	3.83899e-05	0.00090416	0.000254835	0.00599179	0.169806	0.644427	0.176729	0.0072531	0.111408	0.0601833	0.721064	0.0790983	0.00640709	0.1509	0.0425308					0.185542
	February		16.8707	61.5176	1566.43	101.981	130.753	10.679	0.0410859	0.0112675	0.000442501	0.00679681	0.00530118	0.0648939	1.12444e-16	1.54427e-14	1.23146e-16	6.30508e-17	0.00780632	0.000856328	6.63751e-05	0.00156327	0.000636142	0.0109284	0.168405	0.633125	0.173629	0.00681884	0.104737	0.08169	0.714313	0.0783578	0.00607362	0.143046	0.0582098					0.335241
	March		9.81664	35.7956	959.569	62.4719	56.4693	6.07543	0.0706094	0.0193641	0.000722353	0.0110953	0.0122748	0.114066	1.93243e-16	2.65396e-14	2.01028e-16	1.02926e-16	0.0134158	0.00147167	0.000108353	0.00255193	0.00147297	0.0190207	0.166752	0.619023	0.169762	0.00633277	0.0972713	0.107611	0.705325	0.0773719	0.00569658	0.134166	0.0774404					0.576139
	April		6.67141	24.3267	673.93	43.8756	30.5091	4.03054	0.103898	0.0284932	0.00102852	0.015798	0.0227193	0.171937	2.84348e-16	3.90517e-14	2.86232e-16	1.46551e-16	0.0197407	0.00216549	0.000154277	0.00363354	0.00272632	0.0284203	0.165294	0.60428	0.165719	0.00598192	0.0918823	0.132137	0.694598	0.0761951	0.00542842	0.12785	0.0959287					0.84776
	May		5.81581	21.2069	599.979	39.0611	23.7733	3.46629	0.119183	0.032685	0.00115529	0.0177452	0.0291565	0.199925	3.2618e-16	4.47968e-14	3.21511e-16	1.64614e-16	0.0226448	0.00248406	0.000173293	0.00408139	0.00349878	0.0328824	0.164473	0.596139	0.163486	0.00577859	0.0887591	0.145837	0.688662	0.0755439	0.00527009	0.124121	0.106403					0.972479
	June		5.48922	20.016	573.841	37.3595	20.9205	3.24138	0.126274	0.0346297	0.00120791	0.0185535	0.0331324	0.213798	3.45586e-16	4.74621e-14	3.36156e-16	1.72112e-16	0.0239921	0.00263185	0.000181186	0.0042673	0.00397589	0.0350483	0.163932	0.590625	0.161974	0.00564977	0.0867805	0.154971	0.684544	0.0750922	0.00516961	0.121755	0.11344					1.03034
	July		5.65575	20.6232	579.58	37.733	21.9666	3.3432	0.122556	0.03361	0.00119595	0.0183698	0.0315546	0.207287	3.35411e-16	4.60646e-14	3.32827e-16	1.70408e-16	0.0232857	0.00255436	0.000179392	0.00422505	0.00378656	0.034031	0.164174	0.59124	0.162143	0.00576954	0.0886201	0.152227	0.684248	0.0750598	0.00527143	0.124153	0.111268					1
	August		6.02598	21.9732	624.547	40.6606	22.3011	3.53915	0.115027	0.0315451	0.00110984	0.0170471	0.0310813	0.19581	3.14804e-16	4.32344e-14	3.08864e-16	1.58138e-16	0.021855	0.00239743	0.000166476	0.00392084	0.00372976	0.0320695	0.163779	0.58744	0.161101	0.00566794	0.0870596	0.158732	0.681489	0.0747571	0.00519109	0.122261	0.116302					0.938562
	September		8.59752	31.3501	863.755	56.2341	36.8566	5.14604	0.0806218	0.0221099	0.000802481	0.0123261	0.0188066	0.134667	2.20645e-16	3.03029e-14	2.23327e-16	1.14344e-16	0.0153181	0.00168035	0.000120372	0.00283501	0.00225679	0.0222107	0.16493	0.598676	0.164182	0.00595901	0.0915305	0.139653	0.689675	0.0756551	0.00541957	0.127642	0.101608					0.657835
	October		13.7682	50.2046	1320.23	85.9523	72.4969	8.42032	0.0503441	0.0138064	0.000525021	0.00806433	0.00956106	0.0823009	1.37781e-16	1.89226e-14	1.46111e-16	7.4809e-17	0.00956537	0.00104929	7.87532e-05	0.0018548	0.00114733	0.0136955	0.166408	0.611707	0.167756	0.00637929	0.0979859	0.116172	0.69843	0.0766154	0.00575028	0.135431	0.0837738					0.410784
	November		26.9727	98.3536	2435.21	158.542	217.491	17.0735	0.0256981	0.0070475	0.000284636	0.004372	0.00318702	0.0405893	7.03304e-17	9.65902e-15	7.92129e-17	4.0557e-17	0.00488264	0.00053561	4.26953e-05	0.00100556	0.000382442	0.00684895	0.168738	0.633126	0.17363	0.00701258	0.107713	0.0785187	0.712904	0.0782032	0.00623385	0.14682	0.0558395					0.209684
	December		46.6149	169.977	4053	263.867	549.164	30.1205	0.0148696	0.00407788	0.000171021	0.00262688	0.00126219	0.0230076	4.06951e-17	5.58898e-15	4.75943e-17	2.43683e-17	0.00282523	0.000309919	2.56531e-05	0.000604182	0.000151462	0.00391645	0.170224	0.646293	0.17724	0.00743322	0.114174	0.0548595	0.721376	0.0791326	0.00655009	0.154268	0.0386734					0.121329

## Sheet: UVA
USE THIS SHEET IF THE POLLUTANT MOSTLY ABSORBS SUNLIGHT IN THE UVA REGION
	UVB	UVA	300-450 nm
January	0.0673	0.197	0.214
February	0.168	0.352	0.37
March	0.389	0.596	0.604
April	0.72	0.862	0.86
May	0.924	0.979	0.966
June	1.05	1.03	1.01		PLEASE DO NOT MODIFY THESE ENTRIES
July	1	1	1
August	0.985	0.934	0.928
September	0.596	0.664	0.671
October	0.303	0.421	0.439
November	0.101	0.22	0.238
December	0.04	0.129	0.143
Copy and paste an entire line from an output .csv file to replace the line of numbers below (the output files are those generated by SAVETABLE)
	X	Y	t_OH	t_CO3	t_1O2	t_3DOM	t_Phot	t_tot	k_OH	k_CO3	k_1O2	k_3DOM	k_Phot	k_tot	coOH	coCO3	co1O2	co3DOM	f_OH	f_CO3	f_1O2	f_3DOM	f_Phot	f_tot	y_tot	role_OH_P	role_CO3_P	role_1O2_P	role_3DOM_P	role_Phot_P	role_OH_I	role_CO3_I	role_1O2_I	role_3DOM_I	role_Phot_I	NO3_OH	NO2_OH	DOM_OH		OH_calc
Paste here =>	1	1e-06	5.65575	20.6232	579.58	37.733	21.9666	3.34391	0.122556	0.03361	0.00119595	0.0183698	0.0315546	0.207287	3.35411e-16	4.60646e-14	3.32827e-16	1.70408e-16	0.0232857	0.00255436	0.000179392	0.00422505	0.00378656	0.034031	0.164174	0.59124	0.162143	0.00576954	0.0886201	0.152227	0.684248	0.0750598	0.00527143	0.124153	0.111268	0.0991236	0.818643	0.0822334
	January		30.4824	111.152	2708.32	176.323	111.505	17.5984	0.0227393	0.00623606	0.000255933	0.00393113	0.00621627	0.0393787	6.22327e-17	8.54689e-15	7.12251e-17	3.64672e-17	0.00432046	0.00047394	3.83899e-05	0.00090416	0.000745952	0.0064829	0.16463	0.577452	0.158361	0.00649928	0.0998289	0.157859	0.666439	0.0731062	0.00592172	0.139468	0.115064					0.185542
	February		16.8707	61.5176	1566.43	101.981	62.405	9.80199	0.0410859	0.0112675	0.000442501	0.00679681	0.0111072	0.0706999	1.12444e-16	1.54427e-14	1.23146e-16	6.30508e-17	0.00780632	0.000856328	6.63751e-05	0.00156327	0.00133287	0.0116252	0.16443	0.581131	0.15937	0.00625886	0.0961361	0.157104	0.671502	0.0736616	0.00570961	0.134473	0.114654					0.335241
	March		9.81664	35.7956	959.569	62.4719	36.8566	5.74638	0.0706094	0.0193641	0.000722353	0.0110953	0.0188066	0.120598	1.93243e-16	2.65396e-14	2.01028e-16	1.02926e-16	0.0134158	0.00147167	0.000108353	0.00255193	0.00225679	0.0198045	0.16422	0.585495	0.160567	0.00598977	0.0920029	0.155945	0.67741	0.0743097	0.00547112	0.128856	0.113953					0.576139
	April		6.67141	24.3267	673.93	43.8756	25.4833	3.92817	0.103898	0.0284932	0.00102852	0.015798	0.0272001	0.176418	2.84348e-16	3.90517e-14	2.86232e-16	1.46551e-16	0.0197407	0.00216549	0.000154277	0.00363354	0.00326401	0.028958	0.164144	0.588932	0.16151	0.00582999	0.0895486	0.15418	0.6817	0.0747803	0.00532763	0.125476	0.112716					0.84776
	May		5.81581	21.2069	599.979	39.0611	22.4378	3.43646	0.119183	0.032685	0.00115529	0.0177452	0.030892	0.201661	3.2618e-16	4.47968e-14	3.21511e-16	1.64614e-16	0.0226448	0.00248406	0.000173293	0.00408139	0.00370704	0.0330906	0.16409	0.591009	0.162079	0.00572886	0.0879952	0.153188	0.684328	0.0750685	0.00523692	0.12334	0.112027					0.972479
	June		5.48922	20.016	573.841	37.3595	21.3268	3.25098	0.126274	0.0346297	0.00120791	0.0185535	0.0325013	0.213167	3.45586e-16	4.74621e-14	3.36156e-16	1.72112e-16	0.0239921	0.00263185	0.000181186	0.0042673	0.00390015	0.0349726	0.164062	0.592374	0.162454	0.0056665	0.0870374	0.152469	0.686026	0.0752548	0.0051808	0.122018	0.11152					1.03034
	July		5.65575	20.6232	579.58	37.733	21.9666	3.3432	0.122556	0.03361	0.00119595	0.0183698	0.0315546	0.207287	3.35411e-16	4.60646e-14	3.32827e-16	1.70408e-16	0.0232857	0.00255436	0.000179392	0.00422505	0.00378656	0.034031	0.164174	0.59124	0.162143	0.00576954	0.0886201	0.152227	0.684248	0.0750598	0.00527143	0.124153	0.111268					1
	August		6.02598	21.9732	624.547	40.6606	23.5188	3.56847	0.115027	0.0315451	0.00110984	0.0170471	0.029472	0.194201	3.14804e-16	4.32344e-14	3.08864e-16	1.58138e-16	0.021855	0.00239743	0.000166476	0.00392084	0.00353665	0.0318764	0.164142	0.592308	0.162435	0.00571491	0.0877811	0.151761	0.685618	0.07521	0.00522254	0.123001	0.110949					0.938562
	September		8.59752	31.3501	863.755	56.2341	33.0822	5.06533	0.0806218	0.0221099	0.000802481	0.0123261	0.0209523	0.136812	2.20645e-16	3.03029e-14	2.23327e-16	1.14344e-16	0.0153181	0.00168035	0.000120372	0.00283501	0.00251427	0.0224681	0.164226	0.589287	0.161607	0.00586555	0.0900949	0.153146	0.681772	0.0747881	0.00535746	0.126179	0.111904					0.657835
	October		13.7682	50.2046	1320.23	85.9523	52.1771	8.05586	0.0503441	0.0138064	0.000525021	0.00806433	0.0132845	0.0860244	1.37781e-16	1.89226e-14	1.46111e-16	7.4809e-17	0.00956537	0.00104929	7.87532e-05	0.0018548	0.00159414	0.0141424	0.164399	0.58523	0.160495	0.00610317	0.0937447	0.154427	0.676364	0.0741949	0.00556861	0.131152	0.112721					0.410784
	November		26.9727	98.3536	2435.21	158.542	99.848	15.6277	0.0256981	0.0070475	0.000284636	0.004372	0.00694202	0.0443443	7.03304e-17	9.65902e-15	7.92129e-17	4.0557e-17	0.00488264	0.00053561	4.26953e-05	0.00100556	0.000833043	0.00729955	0.164611	0.579514	0.158927	0.00641877	0.0985923	0.156548	0.668896	0.0733757	0.00584904	0.137756	0.114122					0.209684
	December		46.6149	169.977	4053	263.867	170.283	26.8438	0.0148696	0.00407788	0.000171021	0.00262688	0.00407055	0.025816	4.06951e-17	5.58898e-15	4.75943e-17	2.43683e-17	0.00282523	0.000309919	2.56531e-05	0.000604182	0.000488466	0.00425345	0.16476	0.575986	0.157959	0.0066246	0.101754	0.157676	0.664221	0.0728629	0.00603112	0.142045	0.11484					0.121329

## Sheet: 300-450 nm
USE THIS SHEET IF ABSORPTION BY THE POLLUTANT IS SIGNIFICANTLY EXTENDED INTO THE VISIBLE
	UVB	UVA	300-450 nm
January	0.0673	0.197	0.214
February	0.168	0.352	0.37
March	0.389	0.596	0.604
April	0.72	0.862	0.86
May	0.924	0.979	0.966
June	1.05	1.03	1.01		PLEASE DO NOT MODIFY THESE ENTRIES
July	1	1	1
August	0.985	0.934	0.928
September	0.596	0.664	0.671
October	0.303	0.421	0.439
November	0.101	0.22	0.238
December	0.04	0.129	0.143
Copy and paste an entire line from an output .csv file to replace the line of numbers below (the output files are those generated by SAVETABLE)
	X	Y	t_OH	t_CO3	t_1O2	t_3DOM	t_Phot	t_tot	k_OH	k_CO3	k_1O2	k_3DOM	k_Phot	k_tot	coOH	coCO3	co1O2	co3DOM	f_OH	f_CO3	f_1O2	f_3DOM	f_Phot	f_tot	y_tot	role_OH_P	role_CO3_P	role_1O2_P	role_3DOM_P	role_Phot_P	role_OH_I	role_CO3_I	role_1O2_I	role_3DOM_I	role_Phot_I	NO3_OH	NO2_OH	DOM_OH		OH_calc
Paste here =>	1	1e-06	5.65575	20.6232	579.58	37.733	21.9666	3.34391	0.122556	0.03361	0.00119595	0.0183698	0.0315546	0.207287	3.35411e-16	4.60646e-14	3.32827e-16	1.70408e-16	0.0232857	0.00255436	0.000179392	0.00422505	0.00378656	0.034031	0.164174	0.59124	0.162143	0.00576954	0.0886201	0.152227	0.684248	0.0750598	0.00527143	0.124153	0.111268	0.0991236	0.818643	0.0822334
	January		30.4824	111.152	2708.32	176.323	102.647	17.3619	0.0227393	0.00623606	0.000255933	0.00393113	0.0067527	0.0399151	6.22327e-17	8.54689e-15	7.12251e-17	3.64672e-17	0.00432046	0.00047394	3.83899e-05	0.00090416	0.000810323	0.00654728	0.16403	0.569691	0.156233	0.00641193	0.0984873	0.169177	0.659887	0.0723874	0.0058635	0.138097	0.123765					0.185542
	February		16.8707	61.5176	1566.43	101.981	59.3691	9.72387	0.0410859	0.0112675	0.000442501	0.00679681	0.0116752	0.0712679	1.12444e-16	1.54427e-14	1.23146e-16	6.30508e-17	0.00780632	0.000856328	6.63751e-05	0.00156327	0.00140103	0.0116933	0.164076	0.576499	0.1581	0.00620898	0.0953699	0.163822	0.667588	0.0732322	0.00567633	0.133689	0.119814					0.335241
	March		9.81664	35.7956	959.569	62.4719	36.3685	5.73437	0.0706094	0.0193641	0.000722353	0.0110953	0.019059	0.12085	1.93243e-16	2.65396e-14	2.01028e-16	1.02926e-16	0.0134158	0.00147167	0.000108353	0.00255193	0.00228708	0.0198348	0.164127	0.584272	0.160232	0.00597726	0.0918107	0.157708	0.676376	0.0741962	0.00546276	0.128659	0.115306					0.576139
	April		6.67141	24.3267	673.93	43.8756	25.5425	3.92957	0.103898	0.0284932	0.00102852	0.015798	0.027137	0.176355	2.84348e-16	3.90517e-14	2.86232e-16	1.46551e-16	0.0197407	0.00216549	0.000154277	0.00363354	0.00325644	0.0289504	0.16416	0.589143	0.161567	0.00583208	0.0895807	0.153877	0.681879	0.0747998	0.00532902	0.125509	0.112483					0.84776
	May		5.81581	21.2069	599.979	39.0611	22.7397	3.44347	0.119183	0.032685	0.00115529	0.0177452	0.0304818	0.201251	3.2618e-16	4.47968e-14	3.21511e-16	1.64614e-16	0.0226448	0.00248406	0.000173293	0.00408139	0.00365781	0.0330414	0.16418	0.592213	0.16241	0.00574053	0.0881746	0.151462	0.685347	0.0751803	0.00524472	0.123524	0.110704					0.972479
	June		5.48922	20.016	573.841	37.3595	21.7491	3.26063	0.126274	0.0346297	0.00120791	0.0185535	0.0318702	0.212535	3.45586e-16	4.74621e-14	3.36156e-16	1.72112e-16	0.0239921	0.00263185	0.000181186	0.0042673	0.00382442	0.0348969	0.164193	0.594133	0.162936	0.00568332	0.0872958	0.149952	0.687515	0.0754181	0.00519205	0.122283	0.109592					1.03034
	July		5.65575	20.6232	579.58	37.733	21.9666	3.3432	0.122556	0.03361	0.00119595	0.0183698	0.0315546	0.207287	3.35411e-16	4.60646e-14	3.32827e-16	1.70408e-16	0.0232857	0.00255436	0.000179392	0.00422505	0.00378656	0.034031	0.164174	0.59124	0.162143	0.00576954	0.0886201	0.152227	0.684248	0.0750598	0.00527143	0.124153	0.111268					1
	August		6.02598	21.9732	624.547	40.6606	23.6709	3.57196	0.115027	0.0315451	0.00110984	0.0170471	0.0292827	0.194011	3.14804e-16	4.32344e-14	3.08864e-16	1.58138e-16	0.021855	0.00239743	0.000166476	0.00392084	0.00351393	0.0318537	0.164185	0.592886	0.162594	0.00572049	0.0878667	0.150933	0.686107	0.0752636	0.00522627	0.123089	0.110314					0.938562
	September		8.59752	31.3501	863.755	56.2341	32.7371	5.05716	0.0806218	0.0221099	0.000802481	0.0123261	0.0211732	0.137033	2.20645e-16	3.03029e-14	2.23327e-16	1.14344e-16	0.0153181	0.00168035	0.000120372	0.00283501	0.00254078	0.0224946	0.164154	0.588337	0.161346	0.0058561	0.0899497	0.154511	0.680968	0.0747	0.00535115	0.12603	0.11295					0.657835
	October		13.7682	50.2046	1320.23	85.9523	50.0377	8.00302	0.0503441	0.0138064	0.000525021	0.00806433	0.0138525	0.0865923	1.37781e-16	1.89226e-14	1.46111e-16	7.4809e-17	0.00956537	0.00104929	7.87532e-05	0.0018548	0.0016623	0.0142105	0.164108	0.581392	0.159442	0.00606314	0.0931298	0.159974	0.67312	0.073839	0.0055419	0.130523	0.116977					0.410784
	November		26.9727	98.3536	2435.21	158.542	92.2965	15.4301	0.0256981	0.0070475	0.000284636	0.004372	0.00751001	0.0449123	7.03304e-17	9.65902e-15	7.92129e-17	4.0557e-17	0.00488264	0.00053561	4.26953e-05	0.00100556	0.000901201	0.00736771	0.164047	0.572185	0.156917	0.00633759	0.0973454	0.167215	0.662708	0.0726969	0.00579493	0.136482	0.122318					0.209684
	December		46.6149	169.977	4053	263.867	153.612	26.3922	0.0148696	0.00407788	0.000171021	0.00262688	0.00451231	0.0262577	4.06951e-17	5.58898e-15	4.75943e-17	2.43683e-17	0.00282523	0.000309919	2.56531e-05	0.000604182	0.000541478	0.00430646	0.164007	0.566296	0.155302	0.00651315	0.100042	0.171847	0.656045	0.0719659	0.00595688	0.140296	0.125736					0.121329
